# Supplementary material
Source: publisher figshare collection journal article supplement (https://gsajournals.figshare.com/ndownloader/files/12404651)
Supplement: Supplementary file 1 [file 12404651]

## Sheet: Sheet1
Table S5
gene knocked down	driver	hatchability	bleach resistance	n	p	normal polar body	abnormal polar body	absent	n	p.abnormal	p.absent	fertilization rate	n	p	translation of smg
TER94	P{mat-tub-GAL4}	0	1	44	1	0.857143	0.107143	0.0357143	28	0.231618	1	1	15	1	normal
Dlig-I	P{mat-tub-GAL4}	0	1	42	1	0.130435	0.826087	0.0434783	23	1.03061e-09	0.719772	0.903226	31	0.729233	normal
mcm3	P{mat-tub-GAL4}	0	1	34	1	0.444444	0.555556	0	36	3.64549e-06	1	0.925926	27	0.824639	normal
BRWD3	P{mat-tub-GAL4}	0.143	1	43	1	0.695652	0	0.304348	23	1	0.186459	1	24	1	normal
14-3-3e	P{mat-tub-GAL4}	0	1	53	1	0.0344828	0.931034	0.0344828	29	3.01487e-13	0.558621	0.85	20	0.511518	normal
pzg	P{mat-tub-GAL4}	0.1	0.9655	29	0.391892	0.931034	0.0344828	0.0344828	29	0.77855	1	0.892857	28	0.682979	normal
spag	P{mat-tub-GAL4}	0.143	0.9411	51	0.145752	1	0	0	35	1	1	0.916667	12	0.786629	normal
ball	P{mat-tub-GAL4}	0	0.9714	70	0.368421	0	0.875	0.125	24	8.06507e-13	0.0229885	0.95	20	0.901606	normal
spindly	P{mat-tub-GAL4}	0	0.9839	62	0.579439	0.40625	0.53125	0.0625	32	4.91335e-06	0.789634	1	17	1	normal
spc105r	P{mat-tub-GAL4}	0	1	57	1	0	0.956522	0.0434783	23	4.71892e-13	0.333333	1	22	1	normal
su(var)205	P{mat-tub-GAL4}	0.487	0.9839	62	0.579439	0.702703	0.189189	0.108108	37	0.0331525	0.723276	1	18	1	normal
mbs	P{mat-tub-GAL4}	0	1	56	1	0.685714	0.0857143	0.228571	35	0.231618	0.28737	0.875	16	0.624423	normal
mrityu	MTDGal4	0	1	36	1	0	0.621622	0.378378	37	3.01487e-13	9.53458e-08	0.944444	18	0.882211	normal
PyK	MTDGal4	0	1	50	1	0.225806	0.129032	0.645161	31	0.0142602	5.73572e-06	0.85	33	0.473768	normal
mod(mdg4)	MTDGal4	0	0.9868	76	0.628099	0.333333	0.583333	0.0833333	24	3.27591e-06	0.719772	0.84	25	0.455301	normal
aub	MTDGal4	0	0.9773	44	0.494382	0.357143	0.571429	0.0714286	28	2.96144e-06	0.719772	1	30	1	normal
MCPH1	MTDGal4	0	1	42	1	0.931034	0	0.0689655	29	1	1	1	15	1	normal
αTub67C	MTDGal4	0.056	1	51	1	1	0	0	35	1	1	1	19	1	normal
Pk92B	MTDGal4	0.063	0.9348	46	0.124954	0.535714	0.107143	0.357143	28	0.132242	0.0431739	0.863636	22	0.561914	normal
Plutonium	MTDGal4	0	0.9487	39	0.212565	0	1	0	30	9.07367e-15	1	0.92	25	0.80012	abolished
CG8223	MTDGal4	0.467	1	55	1	0.916667	0	0.0833333	36	1	0.990046	0.833333	24	0.4317	normal
CG3689	MTDGal4	0.304	0.973	37	0.45122	0.783784	0.0810811	0.135135	37	0.26369	0.719772	0.857143	14	0.56441	normal
modulo	MTDGal4	0.185	0.9535	43	0.235893	0.944444	0	0.0555556	54	1	1	0.76	25	0.195155	normal
Bre1	P{mat-tub-GAL4}	0	1	63	1	0.710526	0.0789474	0.157895	38	0.254891	0.333333	1	22	1	normal
ana1	MTDGal4	0	0.9737	38	0.457831	0.9	0	0.1	20	1	0.944798	1	12	1	normal
sle	MTDGal4	0	0.9487	39	0.212565	0.954545	0	0.0454545	22	1	1	0.952381	21	0.909806	normal
Acn	MTDGal4	0	0.4138	58	6.54652e-12	0.578947	0.105263	0.315789	38	0.128852	0.0544558	0.833333	18	0.455584	normal
Attp2	MTDGal4		1	45	NA	0.925926	0	0.0740741	27	1	1	0.888889	27	NA	normal
Table S5. Accessment of egg activation events and fertilization in maternal knockdown that led to early embryogenesis arrest.
